# Supplementary material
Source: Springer Nature journal article supplement (https://www.springermedizin.de/resource/supplementary/12936_2012_2602_MOESM4_ESM.pdf/9543242)

**A**

Goundam

Gao

Tombouctou

Brazil

Slide

53

55

70

83

61

64

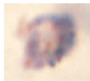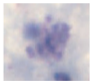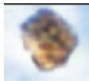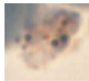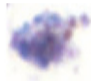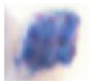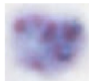**B**

117 bp →

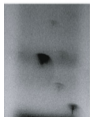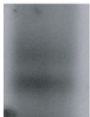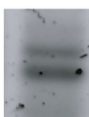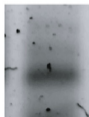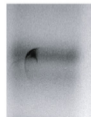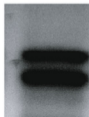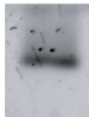

Supplement: MOESM4 [file 9543242]
